# Supplementary material
Source: ML conference proceedings conference paper supplement (https://proceedings.neurips.cc/paper_files/paper/2009/hash/8f1d43620bc6bb580df6e80b0dc05c48-Abstract.html)
Supplement: Supplementary file 1 [file 8f1d43620bc6bb580df6e80b0dc05c48-Supplemental.zip › extra/NIPS2009_1109_extra.pdf]

---

# Posterior vs. Parameter Sparsity in Latent Variable Models

## Supplementary Material

---

**João V. Graça**  
L<sup>2</sup>F INESC-ID  
Lisboa, Portugal

**Kuzman Ganchev**  
University of Pennsylvania  
Philadelphia, PA, USA

**Ben Taskar**

**Fernando Pereira**  
Google Research  
Mountain View, CA, USA

## 1 Dual Derivation

### 1.1 Derivation of the $\ell_1/\ell_\infty$ dual program

We want to optimize the objective:

$$\begin{aligned} \min_{q, c_{wt}} \quad & \text{KL}(q||p) + \sigma \sum_{wt} c_{wt} \\ \text{s. t.} \quad & \mathbf{E}_q[f_{wti}] \leq c_{wt} \\ & 0 \leq c_{wt} \end{aligned} \tag{1}$$

The Lagrangian becomes:

$$L(q, c, \alpha, \lambda) = \text{KL}(q||p) + \sigma \sum_{wt} c_{wt} + \sum_{wti} \lambda_{wti} (\mathbf{E}_q[f_{wti}] - c_{wt}) - \alpha \cdot c \tag{2}$$

where we are maximizing with respect to  $\lambda \geq 0$  and  $\alpha \geq 0$ . Taking the derivative with respect to  $q(z)$  we have:

$$\frac{\partial L(q, c, \alpha, \lambda)}{\partial q(z)} = \log q(z) + 1 - \log p(z) - f(z) \cdot \lambda \tag{3}$$

Setting this to zero and ensuring  $q$  normalizes we get:

$$q(z) = \frac{p(z) \exp(-f(z) \cdot \lambda)}{Z_\lambda} \tag{4}$$

Taking the derivative with respect to  $c_{wt}$  we have:

$$\frac{\partial L(q, c, \alpha, \lambda)}{\partial c_{wt}} = \sigma - \sum_i \lambda_{wti} - \alpha_{wt} \tag{5}$$

setting this to zero gives us  $\alpha_{wt} = \sigma - \sum_i \lambda_{wti}$ . Knowing that  $\alpha_{wt} \geq 0$  we will have to introduce the constraint  $\sigma \geq \sum_i \lambda_{wti}$ . Substituting into the KL term we have: yields:

$$\begin{aligned} \text{KL}(q||p) &= \sum_z \frac{p(z) \exp(-f(z) \cdot \lambda)}{Z_\lambda} \log \frac{p(z) \exp(-f(z) \cdot \lambda)}{Z_\lambda p(z)} \\ &= -\log(Z_\lambda) - \mathbf{E}_q[\lambda \cdot f] \end{aligned} \tag{6}$$

The second part of this will cancel with  $\sum_{wti} \lambda_{wti} \mathbf{E}_q[f_{wti}]$  leaving us with:

$$\begin{aligned} L(q, c, \alpha, \lambda) &= -\log(Z_\lambda) + \sigma \sum_{wt} c_{wt} + \sum_{wti} \lambda_{wti} (-c_{wt}) - \alpha \cdot c \\ &= -\log(Z_\lambda) + \sigma \sum_{wt} c_{wt} - \sum_{wti} \lambda_{wti} c_{wt} - \sum_{wt} c_{wt} (\sigma - \sum_i \lambda_{wti}) \\ &= -\log(Z_\lambda) \end{aligned} \tag{7}$$

So our objective becomes very simple:

$$\begin{array}{ll} \max_{\lambda \geq 0} & -\log(Z_\lambda) \\ \text{s. t.} & \sum_i \lambda_{wti} \leq \sigma \end{array} \quad (8)$$

This can be done via projected gradient. The projection can be done in a way described in [2]. The basic idea is to use the fact that the solution will be of the form  $\max(0, \lambda + \theta)$  for some  $\theta$ .

## 2 Corpora

This section presents extra information about the four different corpora used in the main paper: the Wall Street Journal portion of the Penn treebank [3] using all 45 tags (PTB45) and with a tag set reduced to 17 tags [5] (PTB17); the Bosque subset of the Portuguese Floresta Sinta(c)tica Treebank [1]<sup>1</sup> used for the ConLL X shared task on dependency parsing (PT-CoNLL)<sup>2</sup>; and the Bulgarian BulTreeBank [4] (BulTree) with the 12 coarse tags. All words that occurred only once were replaced by the token “unk”. To measure model sparsity, we compute the average  $\ell_1/\ell_\infty$  norm over words occurring more than 10 times; the label ‘L1LMax’ denotes this measure in figures. Table 1 gives statistics for each corpus as well as the sparsity for a first-order HMM trained on the labeled data.

|          | Types | Tokens | Unk  | Tags | Sup. $\ell_1/\ell_\infty$ | EM $\ell_1/\ell_\infty$ |
|----------|-------|--------|------|------|---------------------------|-------------------------|
| PT-Conll | 11293 | 206678 | 8.5% | 22   | 1.14                      | 4.57                    |
| BulTree  | 12177 | 174160 | 10%  | 12   | 1.04                      | 3.51                    |
| PTB17    | 23768 | 950028 | 2%   | 17   | 1.23                      | 3.97                    |
| PTB45    | 23768 | 950028 | 2%   | 45   | 1.37                      | 5.43                    |

Table 1: Corpus statistics. All words with only one occurrence were replaced by the ‘unk’ token. The third column shows the percentage of tokens replaced. Sup.  $\ell_1/\ell_\infty$  is the value of the sparsity measure for a fully supervised HMM trained on all available data and EM  $\ell_1/\ell_\infty$  is the value of the sparsity measure for a fully unsupervised HMM trained using standard EM on all available data.

### 2.1 Tag Sets

The tag sets along with their meaning is described in Tables 2 (Portuguese), 3 and 4 (English) and 5 (Bulgarian). Table 3 has the full Penn Treebank tag set, while Table 4 has shows the coarse version.

| Name      | Category                 | Name      | Category                  |
|-----------|--------------------------|-----------|---------------------------|
| n         | noun                     | prop      | proper noun               |
| adj       | adjective                | v-fin     | finite verb               |
| v-inf     | infinitive               | v-pcp     | participle                |
| v-ger     | gerund                   | art       | article                   |
| pron-det  | determiner pronoun       | pron-indp | independent pronoun       |
| pron-pers | personal pronoun         | adv       | adverb                    |
| num       | numeral                  | prp       | preposition               |
| in        | interjection             | conj-s    | subordinating conjunction |
| conj-c    | coordinating conjunction | ec        | prefixes                  |
| pp        | prepositional phrase     | ?         | ??                        |
| vp        | ??                       |           |                           |

Table 2: Portuguese Conll Tag Set. There are 22 tags, from which only 20 are described in the guidelines<sup>4</sup>. We could not find a description for tags “?” and “vp”. These tags only occur 1 and 2 times in the corpus, respectively.

<sup>1</sup><http://www.linguateca.pt/Floresta/>

<sup>2</sup><http://nextens.uvt.nl/~conll/>

| Name | Category                                  | Name  | Category                                     |
|------|-------------------------------------------|-------|----------------------------------------------|
| \$   | dollar                                    | ‘     | opening quotation mark                       |
| ”    | closing quotation mark                    | (     | opening parenthesis                          |
| )    | closing parenthesis                       | ,     | comma                                        |
| –    | dash                                      | .     | sentence terminator                          |
| :    | colon or ellipsis                         | CC    | conjunction, coordinating                    |
| CD   | numeral, cardinal                         | DT    | determiner                                   |
| EX   | existential there                         | FW    | foreign word                                 |
| IN   | preposition or conjunction, subordinating | JJ    | adjective or numeral, ordinal                |
| JJR  | adjective, comparative                    | JJS   | adjective, superlative                       |
| LS   | list item marker                          | MD    | modal auxiliary                              |
| NNPS | noun, proper, plural                      | NNS   | noun, common, plural                         |
| NN   | noun, common, singular or mass            | NNP   | noun, proper, singular                       |
| PDT  | pre-determiner                            | POS   | genitive marker                              |
| PRP  | pronoun, personal                         | PRP\$ | pronoun, possessive                          |
| RB   | adverb                                    | RBR   | adverb, comparative                          |
| RBS  | adverb, superlative                       | RP    | particle                                     |
| SYM  | symbol                                    | TO    | "to" as preposition or infinitive marker     |
| UH   | interjection                              | VB    | verb, base form                              |
| VBD  | verb, past tense                          | VBG   | verb, present participle or gerund           |
| VD   | verb, past participle                     | VBP   | verb, present tense, not 3rd person singular |
| VBZ  | verb, present tense, 3rd person singular  | WDT   | WH-determiner                                |
| WP   | WH-pronoun                                | WP\$  | WH-pronoun, possessive                       |
| WRB  | Wh-adverb                                 |       |                                              |

Table 3: Penn tree bank full tag set <sup>5</sup>. There are a total of 45 tags.

| Coarse Tag | Treebank tag        | Coarse Tag | Treebank tag              |
|------------|---------------------|------------|---------------------------|
| ADJ        | CD JJ JJR JJS PRP\$ | ADV        | RB RBR RBS                |
| CONJ       | CC                  | DET        | DT PDT                    |
| ENDPUNC    | .                   | INPUNC     | , : LS SYM UH             |
| LPUNC      | “ -LRB              | N          | EX FW NN NNP NNPS NNS PRP |
| POS        | POS                 | PREP       | IN                        |
| PRT        | RP                  | RPUNC      | ” -RRB-                   |
| TO         | TO                  | W          | WDT WP\$ WP WRB           |
| V          | MD VBD VBP VB VBZ   | VBN        | VBN                       |
| VBG        | VBG                 |            |                           |

Table 4: Penn tree bank reduced tag set. There are 17 tags total.

## 2.2 Function Words

Table 6 contains a list of the tags we considered closed class in each of the languages.

## 3 Experiments

This section contains extra experimental results that did not fit in the paper.

Table 7 contains the complete results set for the different corpus/models. For PTB45 Sparse performs better than all other models using the 1-Many mapping, while VEM performs better as observed before. Note that, as described in the paper different values for the transition prior on VEM do not significantly change the results.

Figure 1 shows scatter plots of the performance of each method with respect to the  $\ell_1/\ell_\infty$  value they achieve. We see that all languages follow the pattern described in the main paper, both Sparse and VEM achieve similar sparsity values, but the accuracies are very different. Sparse always achieves a better performance according to 1-Many mapping, while VEM achieves a better performance on 1-1 mapping in half the cases.

| Name | Category     | Name  | Category    |
|------|--------------|-------|-------------|
| N    | noun         | A     | adjective   |
| H    | hybrid       | P     | pronoun     |
| M    | numeral      | V     | verb        |
| D    | adverb       | C     | conjunction |
| T    | article      | R     | Preposition |
| I    | Interjection | Punct | punctuation |

Table 5: Bulgarian BulTree tag set. There are 12 tags total. This is a reduced tag set where only the first letter of each tag was used which describes its main syntactic category. This results in 11 syntactic tags and an extra tag for punctuation.

| PT-Conll  | BulTree | PTB17   |
|-----------|---------|---------|
| art       | C       | CONJ    |
| punc      | M       | DET     |
| prp       | P       | ENDPUNC |
| conj-c    | Punct   | INPUNC  |
| conj-s    | R       | LPUNC   |
| ec        | T       | POS     |
| pp        |         | PREP    |
| pron-det  |         | PRT     |
| pron-indp |         | RPUNC   |
| pron-pers |         | TO      |
|           |         | W       |

Table 6: Function word classes that were provided as input in the weakly-supervised setting described in the paper.

Figure 2 compares the different cluster sizes obtained by different models for all corpora. We see that all corpus follow the same pattern as PT-Conll (described in the paper). VEM with a prior on state emission of  $10^{-1}$  achieves a distribution much more similar to the gold labeling, and with a prior on state emission of  $10^{-3}$  still achieves a distribution closer to EM. These values have a relationship with the accuracy metrics. VEM( $10^{-1}$ ) has a better 1-1 mapping but a worse 1-many mapping.

Table 8 shows the mutual information in bits between gold tag distribution and hidden state distribution, for all models and corpus. We see that Sparse always produces a higher values then the competing methods.

Figure 3 shows performance as a function of the number of training iterations. For readability, the candlesticks have been shifted so as not to overlap; evaluations are performed every 10 iterations. Because of the warmup phase, the first 30 iterations of EM are identical to those of Sparse. Soon after this warmup period Sparse starts to perform much better than both baselines.

### 3.1 Weakly-Supervised Learning

We now consider the case where some supervision has been given in the form of a partial dictionary. As we note in the introduction, by setting to zero the probability of disallowed emissions, this partial supervision ensures sparsity for some words. If the dictionary is small, our method might still achieve some improvement over EM by ensuring sparsity over word types not in the dictionary. As the size of the dictionary increases, we would expect the benefits from our method to decrease, since the dictionary already ensures sparsity. Figure 4 shows the performance of the three learning methods as we increase the size of the dictionary. In all cases the dictionary contains the most common word types, that is, an x-axis value of  $n$  corresponds to a dictionary containing all possible POS tags of the  $n$  most common word types. We see that EM converges with our method for large dictionaries, but small improvements can be seen even with a dictionary of 10k words. Table 9 shows numerical results for a dictionary of 100 word types.

| Estimator                 | PT-Conll         |                  | BulTree          |                  | PTB17            |                  | PTB45            |                   |
|---------------------------|------------------|------------------|------------------|------------------|------------------|------------------|------------------|-------------------|
|                           | 1-Many           | 1-1              | 1-Many           | 1-1              | 1-Many           | 1-1              | 1-Many           | 1-1               |
| EM                        | 64.0(1.2)        | 40.4(3)          | 59.4(2.2)        | 42.0(3.0)        | 67.5(1.3)        | 46.4(2.6)        | 63.1(1.0)        | 44.2(3.0)         |
| VEM( $10^{-1}, 10^{-1}$ ) | 60.4(0.6)        | <b>51.1(2.3)</b> | 54.9(3.1)        | 46.4(3.0)        | 68.2(0.8)*       | <b>52.8(3.5)</b> | 54.6(1.7)        | <b>46.0(2.4)*</b> |
| VEM( $10^{-1}, 10^{-4}$ ) | 63.2(1.0)*       | 48.1(2.2)        | 56.1(2.8)        | 43.3(1.7)*       | 67.3(0.8)*       | 49.6(4.3)        | 59.0(0.8)        | 43.3(1.6)*        |
| VEM( $10^{-4}, 10^{-1}$ ) | 60.4(0.6)        | 50.8(2.5)        | 54.8(3.1)        | 46.2(3.0)        | 68.3(0.9)*       | 52.8(3.5)        | 54.3(1.6)        | 45.8(2.6)*        |
| VEM( $10^{-4}, 10^{-4}$ ) | 63.2(1)*         | 48.1(2.2)        | 56.2(2.8)        | 43.3(1.7)*       | 67.3(0.8)*       | 49.6(4.3)        | 59.0(0.7)        | 43.6(1.5)*        |
| Sparse (10)               | 68.5(1.3)        | 43.3(2.2)        | 65.1(1.0)        | 48.0(3.3)        | 69.5(1.6)        | 50.0(3.5)        | 64.2(1.0)        | 44.3(2.8)*        |
| Sparse (32)               | <b>69.2(0.9)</b> | 43.2(2.9)        | <b>66.0(1.8)</b> | 48.7(2.2)        | <b>70.2(2.2)</b> | 49.5(2.0)        | <b>65.4(1.0)</b> | 44.5(2.7)*        |
| Sparse (100)              | 68.3(2.1)        | 44.5(2.4)        | 65.9(1.6)        | <b>48.9(2.8)</b> | 68.7(1.1)        | 47.8(1.5)*       | 64.7(1.2)        | 42.4(2.5)         |

Table 7: Average accuracy (standard deviation in parentheses) over 10 different runs (same seeds used for each model) for 200 iterations. 1-Many and 1-1 are the two hidden-state to POS mappings described in the text. All models are first order HMMs: EM trained using expectation maximization, VEM trained using variational EM transition priors and observation priors shown in parentheses; Sparse trained using PR where the constraint strength ( $\sigma$ ) in parentheses. **Bold** indicates the best value for each column. Under a paired t-test all results are significant( $p=0.005$ ) against the EM model. Exceptions are marked with a star.

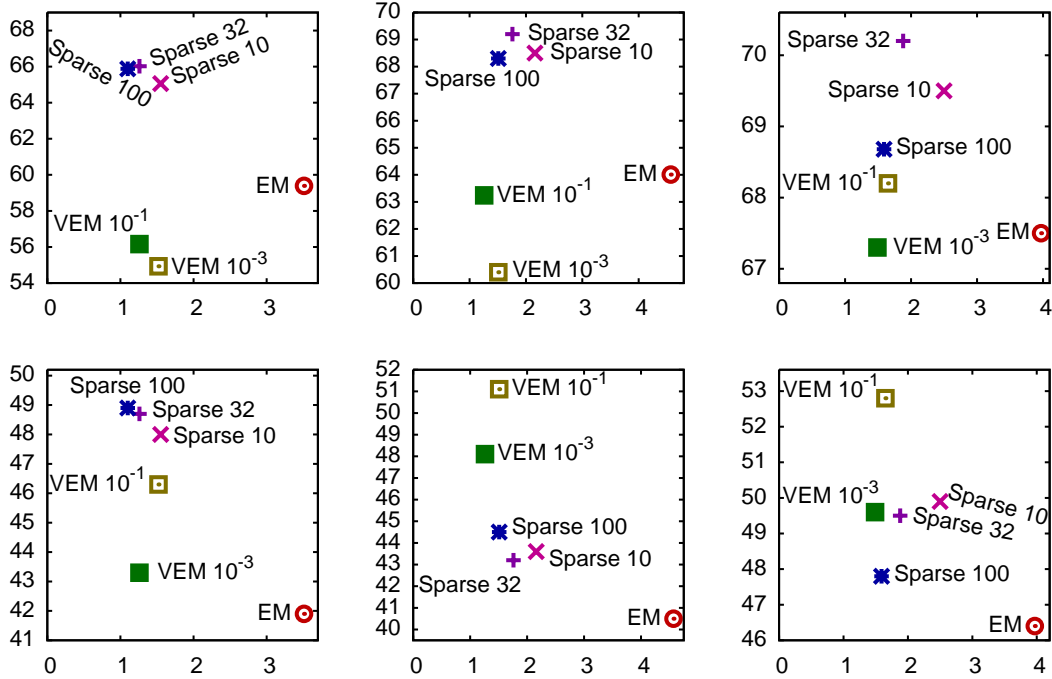

Figure 1: L1LMax vs Accuracy. Top 1-Many mapping, Bottom 1-1 mapping. Left: BulTree, Middle: PT-Conll Right: PTB17

## References

- [1] S. Afonso, E. Bick, R. Haber, and D. Santos. Floresta Sinta(c)tica: a treebank for Portuguese. In *In Proc. LREC*, pages 1698–1703, 2002.
- [2] John Duchi, Shai Shalev-Shwartz, Yoram Singer, and Tushar Chandra. Efficient projections onto the L1-ball for learning in high dimensions. In *In Proc. ICML*, pages 272–279. ACM, 2008.
- [3] M.P. Marcus, M.A. Marcinkiewicz, and B. Santorini. Building a large annotated corpus of English: The Penn Treebank. *Computational linguistics*, 19(2):313–330, 1993.

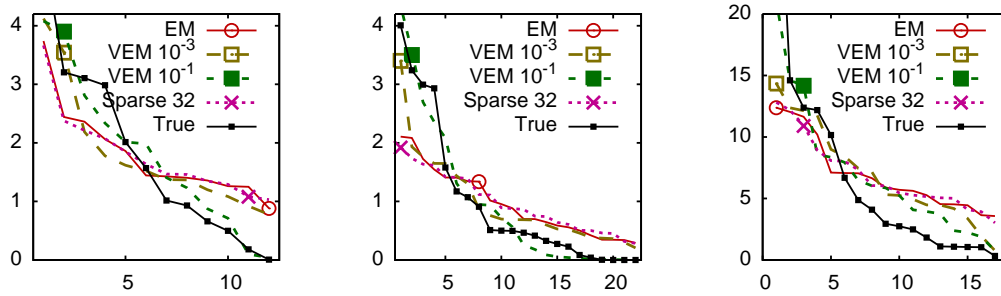

Figure 2: token distribution per hidden state. left: BulTree, middle: PT-Conll, right: PTB17. vertical axis: number of tokens in tens of thousands.

|          | EM   | VEM 0.001 | VEM 0.1 | Sparse 10 | Sparse 32   | Sparse 100 | Max  |
|----------|------|-----------|---------|-----------|-------------|------------|------|
| BG       | 1.32 | 1.30      | 1.24    | 1.50      | <b>1.57</b> | 1.55       | 3.05 |
| PT-Conll | 1.80 | 1.86      | 1.55    | 1.97      | <b>2.07</b> | 2.07       | 3.49 |
| PTB17    | 1.75 | 1.70      | 1.72    | 1.91      | <b>1.94</b> | 1.89       | 3.22 |

Table 8: Mutual information in bits between gold tag distribution and hidden state distribution. Max is the mutual information for a hypothetical optimal distribution that completely matches the gold distribution.

- [4] Kiril Simov, Petya Osenova, Milena Slavcheva, Sia Kolkovska, Elisaveta Balabanova, Dimitar Doikoff, Krassimira Ivanova, Alexander Simov, Er Simov, and Milen Kouylekov. Building a linguistically interpreted corpus of bulgarian: the bultreebank. In *In Proc. LREC*, page pages, 2002.
- [5] N.A. Smith and J. Eisner. Contrastive estimation: Training log-linear models on unlabeled data. In *In Proc. ACL*, pages 354–362, 2005.

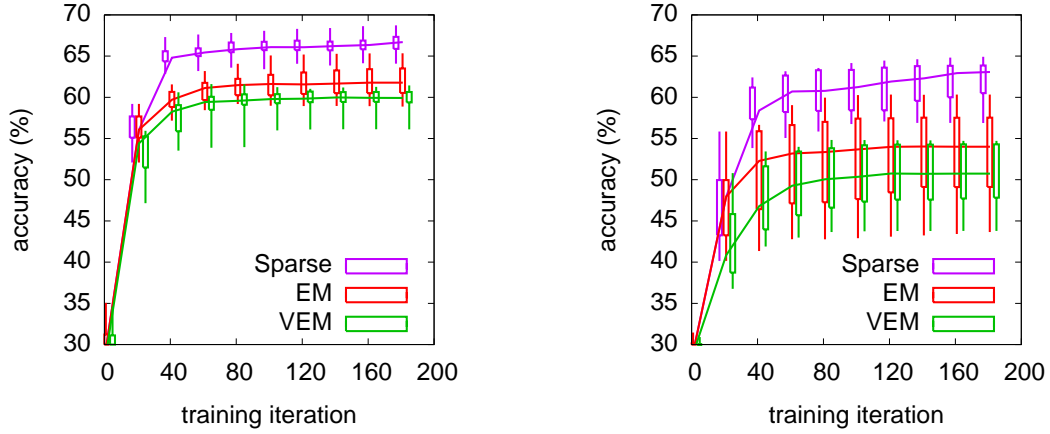

Figure 3: 1-Many learning curves for PT-Conll (left panel) and BulTree (right panel). Best parameter values were chosen from Table 7. Boxes extend from 1<sup>st</sup> to 3<sup>rd</sup> quartile and whiskers give minimum and maximum values.

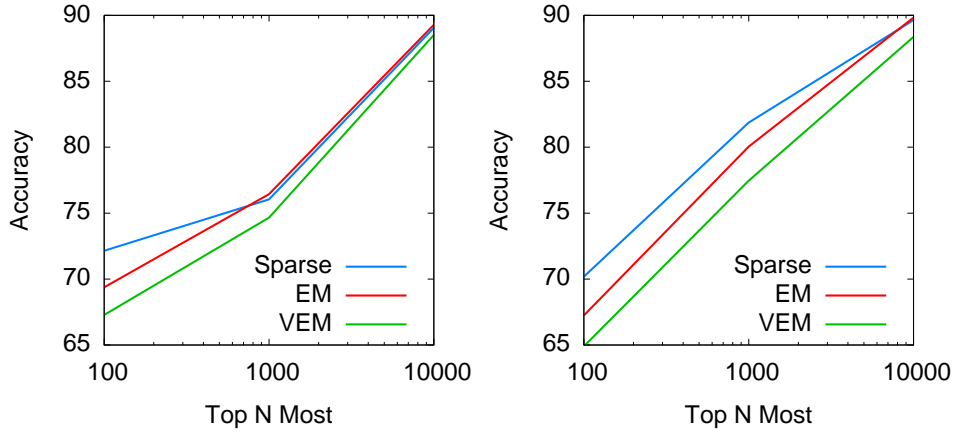

Figure 4: Performance of the three systems for different dictionary sizes on the PTB17 corpus (left) and the PT-CoNLL corpus (right).

| Estimator         | PT-Conll          |                   | BulTree           |                   | PTB17             |                   |
|-------------------|-------------------|-------------------|-------------------|-------------------|-------------------|-------------------|
|                   | 1-Many            | 1-1               | 1-Many            | 1-1               | 1-Many            | 1-1               |
| EM                | 69.4 (1.2)        | 49.6 (3.5)        | 73.2 (1.7)        | 60.4 (1.4)        | 67.2 (3.0)        | 53.7 (4.0)        |
| VEM ( $10^{-1}$ ) | 67.0 (0.9)        | 53.6 (2.7)        | 68.1 (3.5)        | 57.9 (3.0)        | 64.9 (3.9)        | 50.8 (2.0)        |
| VEM ( $10^{-3}$ ) | 67.3 (0.8)        | 48.5 (2.9)        | 68.8 (3.2)        | 57.2 (3.2)        | 64.9 (4.0)        | 46.0 (2.2)        |
| VEM ( $10^{-4}$ ) | 67.3 (0.7)        | 48.5 (2.9)        | 68.8 (3.2)        | 57.2 (3.3)        | 64.9 (4.0)        | 46.0 (2.3)        |
| Sparse (10)       | 72.0 (1.1)        | <b>52.3</b> (4.7) | 76.2(1.0)         | 63.7 (1.3)        | 70.6(1.8)         | <b>54.5</b> (2.2) |
| Sparse (32)       | <b>72.1</b> (1.1) | 52.5 (4.1)        | <b>76.4</b> (1.1) | <b>63.8</b> (0.9) | <b>71.4</b> (2.2) | 53.8 (3.0)        |

Table 9: Weakly-supervised condition with a dictionary for the 100 most common words in the corpus. Average accuracy (standard deviation in parentheses) over 5 different runs (same seeds used for each model) for 200 iterations. Row and column headings and conventions are as in Table ??.
